# Supplementary material for: Land-Use Optimization Based on Ecological Security Pattern—A Case Study of Baicheng, Northeast China
Source: MDPI journal article supplement (doi:10.3390/rs15245671), 2023-12-08
Supplement: s1 [file s1]

## Supplementary Materials

Land-use optimization based on ecological security pattern — A case study of Baicheng,  
Northeast China

Bin Peng <sup>1,2</sup>, Jiuchun Yang <sup>1,\*</sup>, Yixue Li <sup>2</sup>, Shuwen Zhang <sup>1</sup>

<sup>1</sup> Northeast Institute of Geography and Agroecology, Chinese Academy of Sciences,  
Changchun 130102, China

<sup>2</sup> College of Resources and Environment, Shandong Agricultural University, Taian 271018,  
China

\* Correspondence: [yangjiuchun@iga.ac.cn](mailto:yangjiuchun@iga.ac.cn)

**Table S1.** Area of ecological functional zones

| Zone types             | Area (km <sup>2</sup> ) | Percentage (%) |
|------------------------|-------------------------|----------------|
| Ecological core area   | 5112.84                 | 19.92          |
| Ecological buffer area | 9386.54                 | 36.58          |
| Ecotone area           | 7574.48                 | 29.52          |
| Living-productive area | 3588.68                 | 13.98          |

**Table S2.** Land use structure in 2020 for ecological function zones (%)

| Zone types             | Cultivated | Forest | Grassland | Water area | Built-up area | Unused land | Swampland |
|------------------------|------------|--------|-----------|------------|---------------|-------------|-----------|
| Ecological core area   | 31.48      | 6.53   | 16.31     | 3.43       | 1.49          | 23.88       | 16.88     |
| Ecological buffer area | 40.56      | 5.15   | 12.21     | 4.32       | 2.04          | 24.55       | 11.16     |
| Ecotone area           | 58.38      | 4.73   | 9.65      | 4.42       | 3.45          | 17.13       | 2.23      |
| Living-productive area | 64.59      | 5.90   | 7.77      | 1.42       | 8.00          | 11.71       | 0.62      |

**Table S3.** Transition matrices

| Land use types | BAU&EPR |   |   |   |   |   |   | EDP&ELP |   |   |   |   |   |   |
|----------------|---------|---|---|---|---|---|---|---------|---|---|---|---|---|---|
|                | 1       | 2 | 3 | 4 | 5 | 6 | 7 | 1       | 2 | 3 | 4 | 5 | 6 | 7 |
| 1              | 1       | 1 | 1 | 1 | 1 | 0 | 1 | 1       | 1 | 1 | 1 | 1 | 0 | 1 |
| 2              | 1       | 1 | 1 | 1 | 1 | 0 | 1 | 0       | 1 | 1 | 0 | 0 | 0 | 1 |
| 3              | 0       | 1 | 1 | 1 | 1 | 0 | 1 | 0       | 1 | 1 | 0 | 0 | 0 | 1 |
| 4              | 1       | 1 | 1 | 1 | 1 | 1 | 1 | 0       | 1 | 1 | 1 | 0 | 0 | 1 |
| 5              | 1       | 0 | 0 | 0 | 1 | 1 | 0 | 1       | 1 | 1 | 1 | 1 | 1 | 1 |
| 6              | 1       | 1 | 1 | 1 | 1 | 1 | 1 | 1       | 1 | 1 | 1 | 1 | 1 | 1 |
| 7              | 1       | 1 | 1 | 1 | 0 | 1 | 1 | 0       | 1 | 1 | 1 | 0 | 0 | 1 |

Note: 1, 2, 3, 4, 5, 6, 7 represent cultivated, forest, grassland, water area, built-up area, unused land, and swampland respectively; rows denote transfers out and columns denote transfers in.

**Table S4.** Neighborhood weight parameters for the years 2020–2030.

| Land use type        | Cropland | Woodland | Grassland | Water bodies | Construction land | Unused land | Marshland |
|----------------------|----------|----------|-----------|--------------|-------------------|-------------|-----------|
| Neighborhood weights | 0.969    | 0        | 0.133     | 0.134        | 0.135             | 1           | 0.108     |

**Table S5.** Land use structure of ecological corridors in 2020 and CEP scenario (km<sup>2</sup>)

| Scenarios | Cultivated | Forest | Grassland | Water area | Built-up area | Unused land | Swampland |
|-----------|------------|--------|-----------|------------|---------------|-------------|-----------|
| 2020      | 85.80      | 11.86  | 19.52     | 4.20       | 0.50          | 15.10       | 4.26      |
| CEP       | 85.81      | 12.98  | 20.74     | 4.10       | 0.29          | 11.98       | 5.34      |
